# Supplementary material for: A novel, sensitive and convenient method for determination of sialic acids in human serum utilizing ultrasonic-assisted closed in-syringe hydrolysis and derivatization prior to high performance liquid chromatography
Source: Royal Society of Chemistry journal article supplement (doi:10.1039/c5ay02648b), 2015-12-01
Supplement: c5ay02648b1.pdf [file c5ay02648b1.pdf]

## Supplementary materials

**Table S1**

**Experimental data for the derivatization procedure obtained from BBD (n = 3).**

| Run <sup>a</sup> | Independent variable |                   |             |               | Y (peak area) |        |
|------------------|----------------------|-------------------|-------------|---------------|---------------|--------|
|                  | $X_1$                | $X_2$             | $X_3$       | $X_4$         | Neu5Ac        | Neu5Gc |
|                  | (amount of DBCEEC)   | (temperature, °C) | (time, min) | (catalyst, %) |               |        |
| 1                | 10                   | 75                | 35          | 1.0           | 11.9          | 10.5   |
| 2                | 6                    | 75                | 35          | 10.5          | 25.0          | 27.0   |
| 3                | 10                   | 100               | 35          | 10.5          | 4.0           | 3.9    |
| 4                | 6                    | 50                | 30          | 10.5          | 16.5          | 12.8   |
| 5                | 6                    | 75                | 10          | 1.0           | 13.6          | 12.8   |
| 6                | 2                    | 100               | 35          | 10.5          | 1.3           | 2.7    |
| 7                | 2                    | 75                | 35          | 1.0           | 7.6           | 3.9    |
| 8                | 6                    | 75                | 35          | 10.5          | 29.2          | 24.5   |
| 9                | 6                    | 50                | 35          | 1.0           | 5.6           | 6.0    |
| 10               | 10                   | 75                | 35          | 20.0          | 15.5          | 12.5   |
| 11               | 6                    | 50                | 60          | 10.5          | 9.8           | 11.9   |
| 12               | 2                    | 75                | 10          | 10.5          | 6.1           | 7.0    |
| 13               | 6                    | 100               | 35          | 1.0           | 3.4           | 2.8    |
| 14               | 6                    | 75                | 60          | 1.0           | 12.4          | 13.5   |
| 15               | 2                    | 75                | 60          | 10.5          | 6.8           | 6.0    |
| 16               | 6                    | 75                | 10          | 20.0          | 10.0          | 12.5   |
| 17               | 6                    | 75                | 35          | 10.5          | 24.6          | 22.0   |
| 18               | 6                    | 75                | 60          | 20.0          | 19.9          | 20.0   |
| 19               | 2                    | 50                | 35          | 10.5          | 4.3           | 4.8    |
| 20               | 6                    | 75                | 35          | 10.5          | 26.5          | 23.4   |
| 21               | 6                    | 75                | 35          | 10.5          | 26.9          | 25.0   |
| 22               | 10                   | 75                | 10          | 10.5          | 15.0          | 14.2   |
| 23               | 6                    | 100               | 10          | 10.5          | 0.9           | 1.2    |
| 24               | 2                    | 75                | 35          | 20.0          | 4.6           | 5.8    |
| 25               | 10                   | 50                | 35          | 10.5          | 14.5          | 15.2   |
| 26               | 10                   | 75                | 10          | 10.5          | 18.8          | 19.5   |
| 27               | 6                    | 50                | 35          | 20.0          | 15.7          | 15.0   |
| 28               | 6                    | 100               | 35          | 20.0          | 9.6           | 10.0   |
| 29               | 6                    | 100               | 60          | 10.5          | 3.3           | 4.3    |

<sup>a</sup>The 17 runs from the BBD were given by the software Design-Expert 8.1.0 Trial.

**Table S2****Experimental data for the hydrolysis condition obtained from BBD (n = 3).**

| Run <sup>a</sup> | Independent variable       |                      |                                      | Y (peak area) |        |
|------------------|----------------------------|----------------------|--------------------------------------|---------------|--------|
|                  | $X_1$<br>(Temperature, °C) | $X_2$<br>(Time, min) | $X_3$<br>(acid concentration, mol/L) | Neu5Gc        | Neu5Ac |
| 1                | 75                         | 35                   | 2                                    | 16.0          | 31.4   |
| 2                | 100                        | 60                   | 2                                    | 1.0           | 2.9    |
| 3                | 50                         | 60                   | 2                                    | 5.2           | 13.1   |
| 4                | 75                         | 60                   | 3                                    | 7.0           | 11.0   |
| 5                | 75                         | 35                   | 2                                    | 13.0          | 27.8   |
| 6                | 100                        | 10                   | 2                                    | 1.7           | 6.1    |
| 7                | 50                         | 10                   | 2                                    | 5.8           | 10.5   |
| 8                | 75                         | 10                   | 3                                    | 5.5           | 11.0   |
| 9                | 100                        | 35                   | 1                                    | 1.8           | 18.5   |
| 10               | 50                         | 35                   | 3                                    | 5.0           | 10.0   |
| 11               | 100                        | 35                   | 3                                    | 0.99          | 3.9    |
| 12               | 75                         | 10                   | 1                                    | 5.5           | 19.5   |
| 13               | 75                         | 35                   | 2                                    | 14.0          | 32.0   |
| 14               | 75                         | 35                   | 2                                    | 15.0          | 29.6   |
| 15               | 50                         | 35                   | 1                                    | 2.9           | 18.9   |
| 16               | 75                         | 35                   | 2                                    | 13.7          | 30.1   |
| 17               | 75                         | 60                   | 1                                    | 6.1           | 23.8   |
